# Supplementary material for: Structural basis for autophagy inhibition by the human Rubicon–Rab7 complex
Source: PubMed Central journal article supplement — Proc Natl Acad Sci U S A. 2020 Jul 6;117(29):17003–10. doi: 10.1073/pnas.2008030117 (PMC7382272; doi:10.1073/pnas.2008030117), 2020-07-06
Supplement: pnas.2008030117.sapp.pdf [file pnas.2008030117.sapp.pdf]

Supplementary Information for

**Structural basis for autophagy inhibition by the human Rubicon-Rab7 complex**

**Hersh K. Bhargava<sup>1,2,9</sup>, Keisuke Tabata<sup>4</sup>, Jordan M. Byck<sup>1,2</sup>, Maho Hamasaki<sup>3</sup>,  
Daniel P. Farrell<sup>5,6</sup>, Ivan Anishchenko<sup>5,6</sup>, Frank DiMaio<sup>5,6</sup>, Young Jun Im<sup>7</sup>, Tamotsu  
Yoshimori<sup>3,4</sup>, James H. Hurley<sup>1,2,8,\*</sup>**

James H. Hurley

Email: [jimhurley@berkeley.edu](mailto:jimhurley@berkeley.edu)

**This PDF file includes:**

Tables S1

**Table S1. Crystallographic Data Collection and Refinement Statistics**

|                                                                          |                                                   |
|--------------------------------------------------------------------------|---------------------------------------------------|
|                                                                          | Human Rubicon RH Bound to GTP-Rab7 (PDB ID: 6WCW) |
| <b>Data Collection</b>                                                   |                                                   |
| Space Group                                                              | $I2_1$                                            |
| Unit Cell Dimensions<br>a, b, c (Å)<br>$\alpha$ , $\beta$ , $\gamma$ (°) | 60.04, 45.33, 186.28<br>90.00, 98.51, 90.00       |
| Resolution (Å)                                                           | 92.11 - 2.80 (2.95 - 2.80)                        |
| $R_{\text{pim}}$                                                         | 0.1638 (0.3938)                                   |
| $I/\sigma(I)$                                                            | 6.4 (2.2)                                         |
| Completeness (%)                                                         | 99.1 (98.8)                                       |
| Redundancy                                                               | 2.8 (2.8)                                         |
| <b>Refinement</b>                                                        |                                                   |
| Resolution (Å)                                                           | 92.11 - 2.80                                      |
| No. of reflections                                                       | 171,883 (17,031)                                  |
| $R_{\text{work}}/R_{\text{free}}$ (%)                                    | 19.39/26.54                                       |
| Number of atoms<br>Protein<br>Ligand/Ion                                 | 3414<br>33                                        |
| $B$ factors protein (Å <sup>2</sup> )<br>Protein<br>Ligand/Ion           | 58.06<br>49.57                                    |
| RMS Deviations<br>Bond Lengths (Å)<br>Bond Angles (°)                    | 0.009<br>1.05                                     |
| Values in parentheses are for the highest-resolution shell.              |                                                   |
